# 1 **KL-MOB: Automated Covid-19 Recognition** 2 **Using a Novel Approach Based on Image** 3 **Enhancement and a Modified MobileNet** 4 **CNN**

5 **Mundher Mohammed Taresh<sup>1</sup>, Ningbo Zhu<sup>1</sup>, Talal Ahmed Ali Ali<sup>1</sup>,**  
6 **Mohammed Alghaili<sup>1</sup>, Asaad Shakir Hameed<sup>2</sup>, and Modhi Lafta Mutar<sup>2</sup>**

7 <sup>1</sup>**Computer Science, College of Information Science and Engineering, Hunan university,**  
8 **Chang Sha, Hunan, China**

9 <sup>2</sup>**Department of Mathematics, General Directorate of Thi-Qar Education, Ministry of**  
10 **education, Thi-Qar, Iraq**

11 Corresponding author:

12 Mundher Mohammed Taresh<sup>1</sup>

13 Email address: mundhert@hnu.edu.cn

## 14 **ABSTRACT**

15 The emergence of the novel coronavirus pneumonia (Covid-19) pandemic at the end of 2019 led to chaos  
16 worldwide. The world breathed a sigh of relief when some countries announced that they had obtained the  
17 appropriate vaccine and gradually began to distribute it. Nevertheless, the emergence of another wave of  
18 this disease has returned us to the starting point. At present, early detection of infected cases has been  
19 the paramount concern of both specialists and health researchers. This paper aims to detect infected  
20 patients through chest x-ray images. The large dataset available online for Covid-19 (COVIDx) was used  
21 in this research. The dataset consists of 2,128 x-ray images of Covid-19 cases, 8,066 normal cases, and  
22 5,575 cases of pneumonia. A hybrid algorithm was applied to improve image quality before conducting  
23 the neural network training process. This algorithm consisted of combining two different noise reduction  
24 filters in the images, followed by a contrast enhancement algorithm. In this paper, for Covid-19 detection,  
25 a novel convolution neural network (CNN) architecture, KL-MOB (Covid-19 detection network based on  
26 MobileNet structure), was proposed. KL-MOB performance was boosted by adding the Kullback–Leibler  
27 (KL) divergence loss function at the end when trained from scratch. The Kullback–Leibler (KL) divergence  
28 loss function was adopted as content-based image retrieval and fine-grained classification to improve  
29 the quality of image representation. This paper yielded impressive results, overall benchmark accuracy,  
30 sensitivity, specificity, and precision of 98.7%, 98.32%, 98.82%, and 98.37%, respectively. The promising  
31 results in this research may enable other researchers to develop modern and innovative methods to aid  
32 specialists. The tremendous potential of the method proposed in this research can also be utilized to  
33 detect Covid-19 quickly and safely in patients throughout the world.

## 34 **INTRODUCTION**

35 The novel coronavirus 2019 (Covid-19) is a recently recognized disease caused by severe acute respiratory  
36 syndrome coronavirus 2 (SARS-CoV-2). Being highly transmissible and life-threatening, it has rapidly  
37 turned into a global pandemic, affecting worldwide health and well-being. Tragically, no effective  
38 treatment has yet been approved for patients with Covid-19. But the patient can have a good chance of  
39 survival if they are diagnosed early enough.

40 As a widely available, time- and cost-effective diagnosing tool, Chest X-ray (CXR) can potentially  
41 be used for the early recognition of Covid-19. Nevertheless, Covid-19 can share similar radiographic  
42 features with other types of pneumonia, making it difficult for radiologists to distinguish manually. With  
43 such a difficulty, manual detection of Covid-19 becomes time-consuming and mistake-prone as it is left to  
44 the intuitive judgment of the radiologist. As such, it is highly recommended to adopt automated detection

45 techniques.

46 With the rapid spread of Covid-19 globally, researchers have begun using state-of-the-art DL tech-  
47 niques for the automated recognition of Covid-19. The initial lack of Covid-19 data compelled earlier  
48 research to use pre-trained networks to build their own models (Narin et al., 2020; Ozturk et al., 2020;  
49 Apostolopoulos and Mpesiana, 2020; Civit-Masot et al., 2020; Albahli, 2020; Sethy and Behera, 2020;  
50 Apostolopoulos et al., 2020; Chowdhury et al., 2020; Punn and Agarwal, 2020; Farooq and Hafeez, 2020;  
51 Maghdid et al., 2020; Hemdan et al., 2020). Just a few months after being discovered, Covid-19 had  
52 infected millions of peoples worldwide. Consequently, a mid-range dataset of positive cases has been  
53 made available for public use, which was uploaded from [https://github.com/lindawangg/  
54 COVID-Net/blob/master/docs/COVIDx.md](https://github.com/lindawangg/COVID-Net/blob/master/docs/COVIDx.md) by (Wang et al., 2020). This, in turn, has enabled  
55 further progress in developing new, accurate, in-depth models for Covid-19 recognition (Ahmed et al.,  
56 2020; Afshar et al., 2020; Ucar and Korkmaz, 2020; Luz et al., 2020; Hirano et al., 2020; Rezaul Karim  
57 et al., 2020). However, some medical imaging issues usually pose difficulties in the recognition task,  
58 reducing the performance of these models. These issues include, but are not limited to, insufficiency  
59 of training data, inter-class ambiguity, intra-class variation, and visible noise. These problems indeed  
60 necessitate a significant enhancement of the discrimination capability of the associated model.

61 One way around these issues is to utilize proper image-preprocessing techniques for noise elimination  
62 and contrast enhancement. A close look at the available images reveals the presence of various types  
63 of noise, such as impulsive, Poison, speckle, and Gaussian noise. See Figure 1 (the most common  
64 types of noise in X-ray images (Paul et al., 2018)). However, the most prevalent studies have been  
65 dedicated to only some of these types of noise, e.g., Gaussian and Poison. In particular, among many other  
66 techniques, histogram equalization (HE)) (Civit-Masot et al., 2020; Tartaglione et al., 2020), adaptive  
67 total variation method (Punn and Agarwal, 2020), Contrast Limited Adaptive Histogram Equalization  
68 (CLAHE) (El-bana et al., 2020; Saiz and Barandiaran, 2020; Maguolo and Nanni, 2020), white balance  
69 followed by (Siddhartha and Santra, 2020), intensity normalization followed by CLAHE (Horry et al.,  
70 2020; El Asnaoui and Chawki, 2020), histogram equalization (HE), Perona-Malik filter (PMF), unsharp  
71 masking (Rezaul Karim et al., 2020), and Gaussian filter (Jamil et al., 2020) are, as far as we are aware,  
72 the only adopted techniques in Covid-19 recognition to date. Moreover, the utilized filters can result in  
73 blurry (by Gaussian filter) or blocky (by PMF) features in the processed image. Accordingly, there is still  
room to incorporate more effective preprocessing techniques to further increase the system's accuracy.

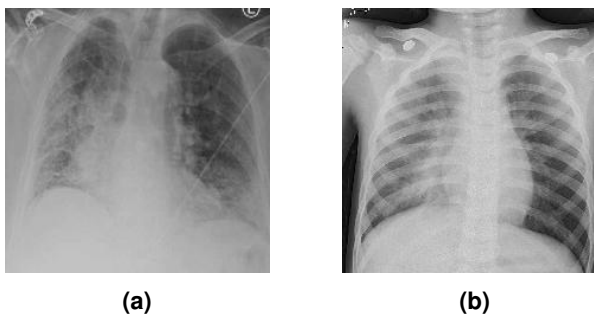

**Figure 1.** Noisy images: a) image with impulsive noise and b) image with Gaussian noise.

74  
75 Motivated by the outstanding results in the previously mentioned works as well as the need for  
76 close-to-perfect recognition models, this paper integrates novel image-preprocessing enhancement with  
77 deep learning to meet the challenges arising from data deficiency and complexity. Specifically, we  
78 combine adaptive median filter (AMF) and Non-Local Means filter (NLMF) to remove the noise from  
79 the images. Indeed, many works have analyzed the performance of these two filters in X-ray imagery  
80 denoising, e.g., (Kim et al., 2020; Raj and Venkateswarlu, 2012; Rabbouch et al., 2020; Sawant et al.,  
81 1999; Mirzabagheri, 2017), demonstrating their superiority to various filters including the ones in the cited  
82 works in terms of removing impulsive, Poison, and speckle noise while preserving the useful image details.  
83 We then utilize the CLAHE approach to enhance the contrast of the denoised images. The enhanced  
84 images are finally fed into a Mobile CNN for training and validation phases. The motivation behind  
85 choosing Mobile CNN is that it not only helps to reduce overfitting but also runs faster than regular CNN  
86 with many fewer parameters (Howard et al., 2017; Yu et al., 2020). Inspired by (Alfasly et al., 2019;

87 Alghaili et al., 2020) we adopt the KL divergence loss to measure how far we are from the optimal solution  
88 during the iterations. We evaluated the performance of the proposed framework on the COVIDx dataset  
89 in terms of a wide variety of metrics: accuracy, sensitivity, specificity, F1-score, area under the curve, and  
90 computational efficiency. Simulation results reveal that the proposed framework significantly outperforms  
91 state-of-the-art models from both quantitative and qualitative perspectives. The main contributions of this  
92 work can be summarized as follows:

- 93 • We propose an automated end-to-end deep learning framework based on MobileNet CNN with KL  
94 divergence loss function for Covid-19 recognition.
- 95 • We incorporate a novel preprocessing enhancement technique consisting of AMF, NLMF, and  
96 CLAHE to meet the challenges arising from data deficiency and complexity.
- 97 • We analyze the performance of the utilized preprocessing enhancement scheme to demonstrate its  
98 role in enhancing the discrimination capability of the proposed model.

99 The rest of this paper is organized as follows: Section (2) illustrates the phases of the proposed method.  
100 Section (3) highlights the experimental results. Section (4) discusses these results. The conclusion of this  
101 study is presented in the last section.

## 102 PROPOSED METHOD

103 In this section, we briefly describe the scenario of the methodology used to achieve the purpose of this  
104 study. The proposed method is depicted in Figure 2, which generally consists of two phases: (a) image  
105 pre-processing, to overcome the existing drawbacks mentioned in the previous section; (b) training and  
testing dedicated to image classification.

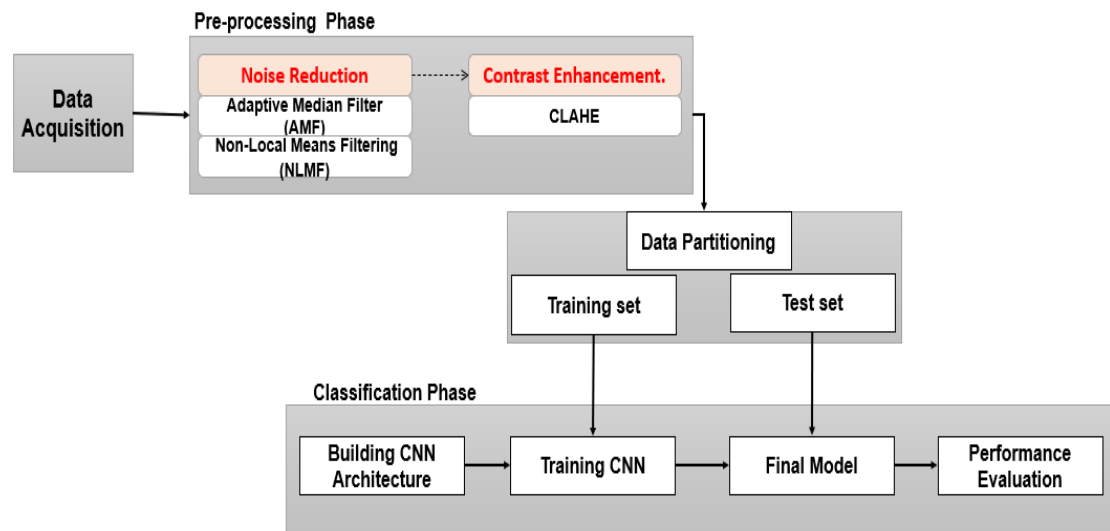

Figure 2. Study Framework.

106

### 107 Data Acquisition

108 In this paper, we used the COVIDx dataset used in (Wang et al., 2020) to train and evaluate the pro-  
109 posed model. In brief, COVIDx dataset is an open-source dataset that can be downloaded from <https://github.com/lindawang/COVID-Net/blob/master/docs/COVIDx.md>. The instruc-  
110 tions given by COVID-Net (Wang et al., 2020) were followed to set up the new dataset. Since the  
111 number of X-ray images available for positive Covid-19 cases is very small, more Covid-19 X-ray im-  
112 ages from <https://github.com/ml-workgroup/covid-19-image-repository> as well  
113 as [https://github.com/armiro/COVID-CXNet/tree/master/chest\\_xray\\_images/  
114 covid19](https://github.com/armiro/COVID-CXNet/tree/master/chest_xray_images/covid19) were also downloaded to overcome this limitation. Duplicated images were omitted from the  
115 new dataset to ensure the proposed model in training is more accurate. So, the actual number of images in  
116 the Covid-19 class became 2128 instead of 1770 in COVIDX (updated on 28 January 2021). We used the  
117

118 same test set that was used for evaluation in (Wang et al., 2020), making a slight change by increasing the  
 119 number of Covid-19 images to 100 images instead of 92. Table 1 summarizes the number of images in  
 each class and the total number of images used for training and testing.

| Data  | Covid19 | Normal | Pneumonia | Total |
|-------|---------|--------|-----------|-------|
| train | 2028    | 7181   | 4981      | 14100 |
| test  | 100     | 885    | 594       | 1579  |

**Table 1.** The number of images for each class.

120

## 121 Data Pre-processing Method

In this study, we attempt to provide an algorithm that would increase the image quality by using a hybrid technique consisting of noise reduction and contrast enhancement. Specifically, two efficient filters are used for noise reduction while CLAHE is used for contrast enhancement. The first filter is the Adaptive Median Filter (AMF) that removes impulse noise (Ning et al., 2009; Khare and Chugh, 2014). This filter is followed by the Non-Local Means Filtering (NLMF) algorithm that calculates similarity based on patches instead of pixels. Given a discrete noisy image  $u = u(i)$  for a pixel  $i$ , the estimated value of  $NL[u](i)$  is measured as the weighted average of all the pixels, i.e.:

$$NL[u](i) = \sum_{j \in \mathcal{I}} w(i, j) \cdot u(j) \quad (1)$$

122 where the weights family  $w(i, j)$  depends on the similarity between the pixels  $i$  and  $j$ .

The similarity between the two pixels  $i$  and  $j$  is defined by the similarity of the intensity of gray-level vectors  $u(N_i)$  and  $u(N_j)$ , where  $N_l$  signifies a square neighborhood of fixed size and centered at a pixel  $L$ . The similarity is measured as a function to minimize the weighted Euclidean distance,  $\|u(N_i) - u(N_j)\|_{(2,a)}^2$  where  $a > 0$  is the Gaussian kernel standard deviation. The pixels with a similar gray-level neighborhood to  $u(N_i)$  have larger weights in the average. These weights are defined as,

$$w(i, j) = \frac{1}{Z_{(i)}} e^{-\frac{\|u(N_i) - u(N_j)\|_{(2,a)}^2}{h^2}} \quad (2)$$

123 where  $Z_{(i)}$  is the normalizing constant, and the settings  $h$  works as a filtering degree.

124 Next, CLAHE is applied to the denoised images to achieve an acceptable visualization and to  
 125 compensate for the effect of the filtration that may contribute some blurring to the images (Huang et al.,  
 126 2016; Senthilkumar and Senthilmurugan, 2014).

## 127 Classification Neural Network Model

We used a deep neural network structure called a MobileNet neural network (Howard et al., 2017). Before we pass the input to the neural network, we resized all images to  $224 \times 224 \times 3$ . These were used as input to the network. Figure 3 depicts the model diagram of the network. The first layer is a Depthwise Conv2D layer of size  $3 \times 3 \times 3$  with stride 1, followed by a Conv2D layer with 64 kernels size of  $1 \times 1 \times 3$  and stride 1. After that, there is another Depthwise Conv2D layer size of  $3 \times 3 \times 64$  with stride 2. Then comes a convolutional layer with 128 kernels and the size of  $1 \times 1 \times 64$  with stride 1 followed by a Depthwise separable convolution layer of size  $3 \times 3 \times 128$  with stride 1. Then there is another convolution layer with 128 kernels size of  $1 \times 1 \times 128$  with stride 1 followed by a Depthwise separable convolution layer of size  $3 \times 3 \times 128$  with stride 2. After that, another convolutional layer with 256 kernels and the size of  $1 \times 1 \times 128$  with stride 1 is followed by a Depthwise Separable Convolution layer of size  $3 \times 3 \times 256$  with stride 2. Then another convolutional layer has 256 kernels with the size of  $1 \times 1 \times 256$  with stride 1, followed by Depthwise Separable Convolution layers of sizes of  $3 \times 3 \times 256$  with stride 2. Then comes a convolutional layer with 512 kernels with the size of  $1 \times 1 \times 256$  with stride 1 followed by another Depthwise separable convolution layers of sizes of  $3 \times 3 \times 512$  with stride 1. This is followed by five blocks of layers, each block consisting of convolutional layers with 512 kernels and the size of  $1 \times 1 \times 512$  with stride 1 followed by Depthwise separable convolution layers of sizes of  $3 \times 3 \times 512$  with stride 1. After that comes another convolutional layer with 1024 kernels of size  $1 \times 1 \times 512$ , then Depthwise separable convolution layers of sizes of  $3 \times 3 \times 1024$  with stride 1. Then again, another convolutional

layer with 1024 kernels with the size of  $1 \times 1 \times 1024$  with stride 1. Then a dropout layer with the rate of 0.001 is added. The dropout layer's output goes to two fully connected layers that generate the output of size 128. One fully connected layer is used to predict the mean  $\mu$ , and the other is used to predict the standard deviation  $\sigma$  of a Gaussian distribution. The mean  $\mu$  and standard deviation  $\sigma$  of a Gaussian distribution are used to calculate the KL loss function. The output of the fully connected layer used to predict the mean  $\mu$  goes to the last layer, a fully connected layer containing the SoftMax activation function that can be used as a classifier, as defined in equation 3, where  $v$  indicates the output vector,  $o$  indicates the Objective vector, and  $p_j$  indicates the input to the neuron  $j$ .

$$\text{SoftMax}(o, v) = - \sum_{i=1}^v o_i \log \left( \frac{e^{p_i}}{\sum_j^v e^{p_j}} \right) \quad (3)$$

The KL divergence between the  $\mu$ ,  $\sigma$  distribution and the prior are considered as a regularization which helps to overcome the over-fitting problem defined in equation 4.

$$KL = - \frac{1}{2} \sum_{i=1}^n (1 + \log(\sigma_i) - \mu_i^2 - \sigma_i) \quad (4)$$

128 where  $n$  is the output vector of the average pooling layer with the size of 1024,  $\mu$  is the mean that has  
 129 been predicted from one fully connected layer, and  $\sigma$  is the standard deviation of a Gaussian distribution  
 130 predicted from one fully connected layer in the network.

131 As soon as the data is pre-processed, the network is trained with a SoftMax classifier for 200 epochs  
 132 using Adam optimizer (Kingma and Ba, 2014) on a GPU. The dataset used for training is divided: 70% as  
 133 a training set and 30% as a validation set. The total number of parameters is 3,488,426, where the number  
 of trainable parameters is 3,466,660, and the non-trainable parameters are 21,766.

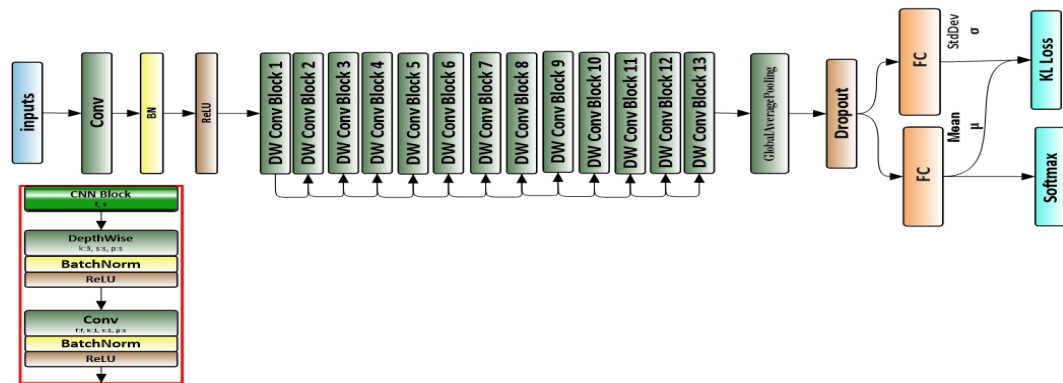

Figure 3. The architecture of the proposed neural network.

134

## 135 Experiments

136 All CXRs were resized to the same dimension of  $224 \times 224$  in .jpg format. In the first phase, the AMF  
 137 window size was taken to be  $5 \times 5$  for effective filtering. The resultant image was subjected to the NLMF  
 138 technique. The performance of NLMF depends on  $7 \times 7$  of the search window,  $5 \times 5$  of the similarity  
 139 window, and the degree of filtering  $h = 1$ . Furthermore, we increased contrast using CLAHE with the bin  
 140 of 256 and block-size of 128 in slope 3 to get the enhanced images. The proposed model (KL-MOB) was  
 141 trained using the Python programming language. All experiments were conducted with a Tesla K80 GPU  
 142 graphics card on Google Collaboratory with Windows 10 operating system. The original and enhanced  
 143 images were used separately to train the KL-MOB, using Adam optimizer, with the initial learning rate  
 144 set to 0.00001, on 200 epochs. We passed the images to KL-MOB as the input to predict the CXR image,  
 145 whether Covid1-9, normal, or pneumonia. Because many functions are not built-in functions in deep  
 146 learning libraries, such as the relu6 activation function with a max value of 6, we needed to build an  
 147 interface for the evaluation process that contains all layers in the network as in a training network but  
 148 which is not used for training. Rather, it is just used to pass on the input image to produce the output  
 149 result.

## 150 Performance Evaluation

### 151 Pre-processing Performance Evaluation

152 The performance of the proposed preprocessing technique was quantified by using various evaluation  
153 metrics such as Mean Average Error (MAE) and Peak Signal to Noise Ratio (PSNR). These metrics are  
154 desirable since they are fast to quantify.

Definition:  $x(i, j)$  denotes the samples of the original image,  $y(i, j)$  denotes the samples of the output image.  $M$  and  $N$  are the number of pixels in row and column directions, respectively.  $MAE$  is calculated as in equation 5, where a large value means that the images are of poor quality.

$$MAE = |E(x) - E(y)| \quad (5)$$

The limited value  $PSNR$  implies that the images are of low quality.  $PSNR$  is described in terms of Mean Square Error  $MSE$  as follows:

$$PSNR = 10 \log_{10} \frac{MAX^2}{MSE} \quad (6)$$

where  $MAX^2$  is the maximum possible pixel intensity value 255 when the pixel is represented by 8 bits.

$$MSE = \sqrt{\frac{1}{MN} \sum_{i=1}^{M-1} \sum_{j=1}^{N-1} [x(i, j) - y(i, j)]^2} \quad (7)$$

### 155 Neural Network Performance Evaluation

The test set described in the previous section was used to evaluate KL-MOB. The classification outcome has four cases: True Positive (TP), False Positive (FP), True Negative (TN), and False Negative (FN). The metrics used to measure the performance are Accuracy (ACC), Sensitivity (TPR), Specificity (SPC), and Precision (PPV), defined as follows:

$$Accuracy (ACC) = \frac{TP + TN}{TP + FP + TN + FN} \quad (8)$$

$$Sensitivity (TPR) = \frac{TP}{TP + FN} \quad (9)$$

$$Specificity (SPC) = \frac{TN}{FP + TN} \quad (10)$$

$$Precision (PPV) = \frac{TP}{TP + FP} \quad (11)$$

The graph plotted between True Positive Rate (TPR) and False Positive Rate (FPR) is the receiver operating characteristic (ROC) curve. FPR is calculated as follows:

$$False Positive Rate (FPR) = \frac{FP}{FP + TN} \quad (12)$$

## 156 RESULTS

157 In the experiments, noise reduction and contrast enhancement performance were evaluated independently  
158 since they are two separate issues. The average value was computed for all images in each class. The  
159 evaluation results are shown in Tables 2, and 3 for noise reduction and image enhancement, respectively.  
160 Figure 4 shows noise reduction techniques that were applied to the original image and the hybrid method  
161 used in this work. Though the denoising filters could present smoothing and blurring to the resulting  
162 images, this can be enhanced by improving the images' edges and by highlighting the high-frequency  
163 components to remove the residual noise. Figure 5 displays the original images and their enhanced  
164 versions

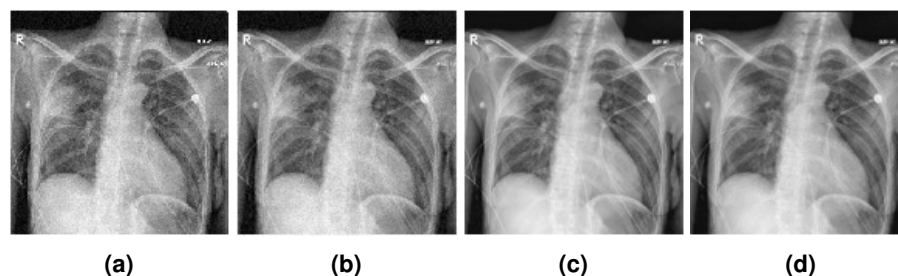

**Figure 4.** The applied noise reduction techniques on the images: (a) original image, (b) image denoised by AMF, (c) image denoised by NLMF, (d) image denoised by our method.

| Method     | Covid19 |       | Normal |       | Pneumonia |       |
|------------|---------|-------|--------|-------|-----------|-------|
|            | PSNR    | MAE   | PSNR   | MAE   | PSNR      | MAE   |
| AMF        | 21.91   | 14.46 | 21.19  | 17.88 | 20.43     | 19.47 |
| NLMF       | 20.47   | 19.19 | 20.41  | 19.41 | 20.40     | 19.40 |
| our method | 22.04   | 14.38 | 21.21  | 17.59 | 20.45     | 19.32 |

**Table 2.** The average values of PSNR (dB) and MAE for the different noise reduction methods.

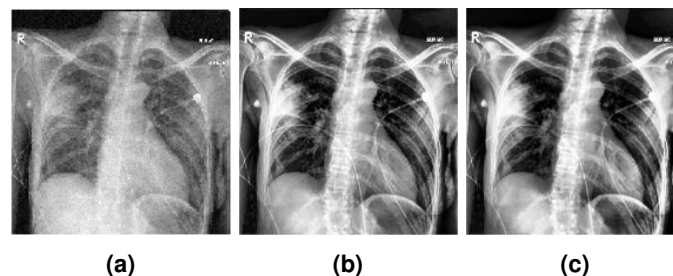

**Figure 5.** The enhanced image results: (a) original image, (b) image with CLAHE, (c) image enhanced by our method.

| Method     | Covid19 |       | Normal |       | Pneumonia |       |
|------------|---------|-------|--------|-------|-----------|-------|
|            | PSNR    | MAE   | PSNR   | MAE   | PSNR      | MAE   |
| CLAHE      | 17.83   | 27.35 | 17.12  | 25.98 | 21.91     | 16.20 |
| our method | 19.14   | 23.13 | 17.28  | 25.45 | 22.11     | 16.01 |

**Table 3.** The average values of PSNR (dB) and MAE for the different contrast enhancement methods.

|           | Enhanced image |       |       |       | Original image |       |       |       |
|-----------|----------------|-------|-------|-------|----------------|-------|-------|-------|
|           | ACC%           | PPV%  | SPC%  | TPR%  | ACC%           | PPV%  | SPC%  | TPR%  |
| Covid19   | 99.87          | 99.00 | 99.93 | 99.00 | 92.61          | 96.83 | 99.13 | 74.39 |
| Normal    | 98.24          | 98.30 | 97.85 | 98.64 | 97.11          | 98.17 | 98.99 | 93.86 |
| Pneumonia | 97.99          | 97.81 | 98.68 | 97.31 | 91.00          | 81.30 | 86.74 | 98.26 |
| Overall   | 98.70          | 98.37 | 98.82 | 98.32 | 93.57          | 92.10 | 94.95 | 88.84 |

**Table 4.** The evaluation metrics of KL-MOB on enhanced and original images.

165 In this experiment, the proposed KL-MOB model was trained on original and enhanced images to  
 166 detect whether they were Covid-19, normal, or pneumonia cases. The evaluation process of the proposed  
 167 KL-MOB performance was applied to each class of the dataset separately. The comparative performances  
 168 of KL-MOB for the classification problem on original and enhanced images are shown in Table 4. It  
 169 is noted that the proposed method has boosted the performance of KL-MOB in Covid-19 detection, as  
 170 shown in the Figures 6, and 7.

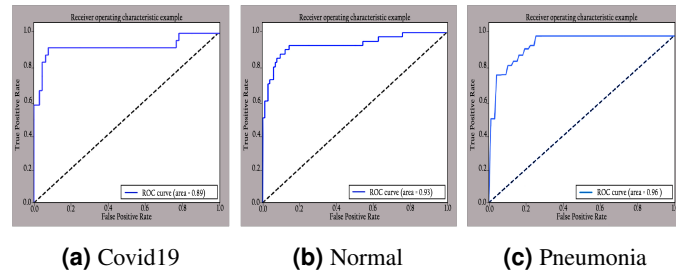

**Figure 6.** ROC curve of different classes on original images.

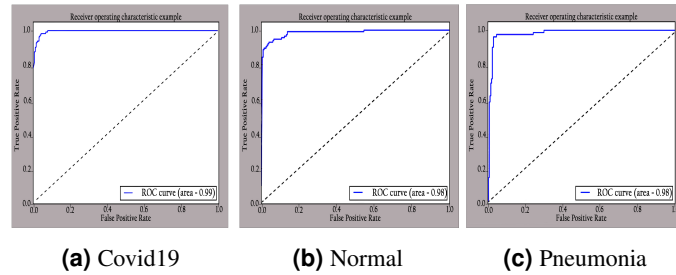

**Figure 7.** ROC curve of different classes on enhanced images.

## 171 DISCUSSION

172 In this work, a new approach based on blending noise-eliminate algorithms with contrast enhancement was  
 173 presented. Adaptation of such an approach introduced a type of hybrid filtering and contrast enhancement  
 174 for the data set of images used for Covid19 detection. Well-known measurable methods—Peak Signal to  
 175 Noise Ratio (PSNR) and Mean Average Error (MAE)— were used as Image Quality Measurements (IQM)  
 176 for assessing and comparing image quality. The results of Table 2 show that using an AMF followed  
 177 by NLMF was entirely favorable for eliminating noises. Our hybrid algorithm was applied to the entire  
 178 image instead of parts of the image while preserving important details. Figure 8 illustrates the difference  
 179 between the original and enhanced CXRs by the method used in this work. Furthermore, we found that  
 180 the damage of the lung in the enhanced image is more perspicuous than in the original image. In addition,  
 CLAHE with a bin of 256 gave the best PSNR value, as shown in Table 3.

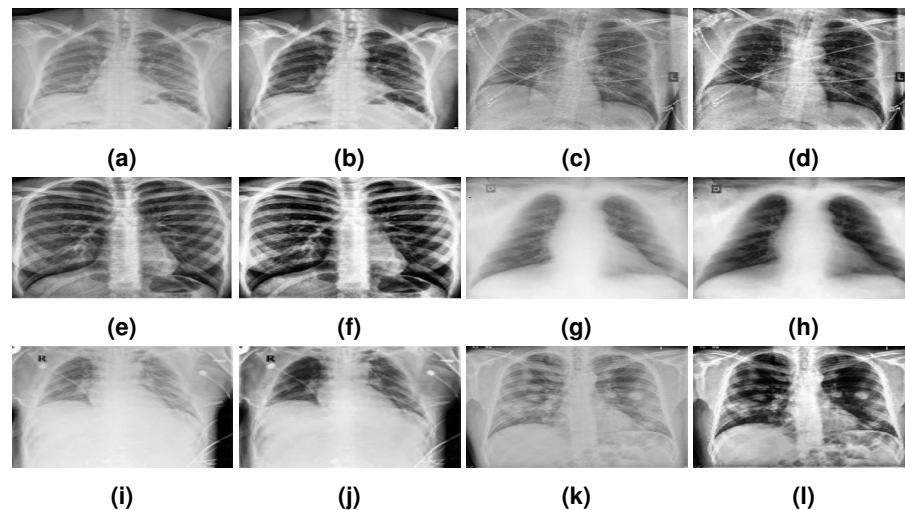

**Figure 8.** The images in the first and third columns show three cases of original images; the images in the second and fourth columns show three cases of enhanced images.



182 The results presented in Table 4 show that the proposed network performed well on the test set,  
 183 which proves that the method used for image pre-processing boosted the performance of KL-MOB. The  
 184 confusion matrix of our proposed network is depicted in Figure 9. It shows that all classes are identified  
 185 with high true positives. It is to be noted that the Covid-19 cases are 99% correctly classified by the  
 186 KL-MOB. There are 1% of Covid-19 cases misclassified as pneumonia (non-Covid-19), and 1.4% of  
 187 the normal cases are misclassified as pneumonia. Only 0.2% of pneumonia (non-Covid-19) cases are  
 188 wrongly classified as Covid-19. These results demonstrate that our proposed KL-MOB has good potential  
 189 in detecting Covid-19; in particular, with limited Covid-19 cases, we show that there is no confusion  
 190 between the normal and Covid-19 patient groups.

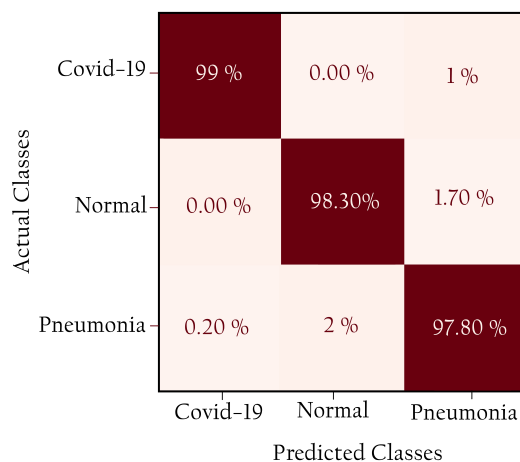

**Figure 9.** Confusion matrix for KL-MOB on the COVIDx test dataset.

191 In our experiment range of 100 patient samples of Covid-19, only one was misclassified with a 99.0%  
 192 PPV for Covid-19, which is an appropriate value compared with 98.9%, and 96.12% for (Wang et al.,  
 193 2020; Rezaul Karim et al., 2020), respectively. In addition, the results obtained from KL-MOB have  
 194 been compared with previous studies that used the same or similar datasets for evaluation, as outlined in  
 195 Table 5. The other studies (Farooq and Hafeez, 2020; Afshar et al., 2020; Hirano et al., 2020; Ucar and  
 196 Korkmaz, 2020), not included in Table 5 for performance comparisons, utilized smaller datasets. The  
 197 results showed that KL-MOB is superior to (Wang et al., 2020; Ahmed et al., 2020) across all performance  
 198 metrics of accuracy, sensitivity (TPR), specificity, and PPV for overall detection.

| Study                      | Classifier         | ACC%  | SPC%  | TPR%  | PPV%  |
|----------------------------|--------------------|-------|-------|-------|-------|
| Wang et al. (2020)         | COVID-Net (large)  | 95.56 | 96.67 | 93.33 | 93.55 |
| Ahmed et al. (2020)        | ReCoNet            | 97.48 | 97.39 | 97.53 | 96.27 |
| Rezaul Karim et al. (2020) | DeepCOVIDExplainer | 98.11 | 98.19 | 95.06 | 96.84 |
| proposed method            | KL-MOB             | 98.7  | 98.82 | 98.32 | 98.37 |

**Table 5.** Comparative performance of different models.

199 The promising deep learning models used for the detection of Covid from radiography images indicate  
 200 that deep learning likely still has untapped potential and can possibly play a more significant role in  
 201 fighting this pandemic. There is definitely still room for improvement, through other processes such as  
 202 increasing the number of images, implementing another pre-processing technique i.e., data augmentation,  
 203 utilizing different noise filters, and enhancement techniques.

## 204 CONCLUSION

205 In this work, we proposed a novel CNN-based MobileNet structure neural network for Covid19 detection  
 206 using COVIDx, the most widely used public dataset of CXR images to date. As well, the evaluation  
 207 results show that our approach outperforming a recent approach with accuracy, specificity, sensitivity,  
 208 and precision of 98.7%, 98.82%, 98.32%, and 98.37%, respectively. The proposed method relied on

209 image manipulation by applying a hybrid technique to enhance the visibility of CXR images. This  
210 advanced pre-processing technique made the task of KL-MOB easier and better able to extract features, as  
211 it helped to recognize complex patterns from medical images at a level comparable to that of experienced  
212 radiologists. The KL loss function was used to boost the performance of KL-MOB which outperformed  
213 recent approaches as shown in the obtained results. Considering several essential factors such as Covid-19  
214 infection spreading patterns, image acquisition time, scanner availability, and costs, we hope our findings  
215 will be a useful contribution to the fight against Covid-19 and towards an increasing acceptance and  
216 adoption of AI-assisted applications in clinical practice. As future work, we will further enhance our  
217 method's performance by including the lateral view of CXR images in our training data, as in some of the  
218 cases, frontal view of CXR images does not give a clear idea in diagnosing pneumonia cases. Further,  
219 since only a limited amount of CXR images for Covid-19 infection cases, the potential for issues to arise  
220 is out-of-distribution is possible, therefore, more unseen data from related distributions is needed for  
221 further evaluation. Finally, the enhancement of the images must be verified with a radiologist, which we  
222 have not yet been able to do due to the emerging conditions.

## 223 **ACKNOWLEDGMENTS**

224 This work was supported in part by the National Natural Science Foundation [61572177].

## 225 REFERENCES

- 226 Afshar, P., Heidarian, S., Naderkhani, F., Oikonomou, A., Plataniotis, K. N., and Mohammadi, A. (2020).  
227 Covid-caps: A capsule network-based framework for identification of covid-19 cases from x-ray images.  
228 *Pattern Recognition Letters*, 138:638–643.
- 229 Ahmed, S., Yap, M. H., Tan, M., and Hasan, M. K. (2020). Reconet: Multi-level preprocessing of chest  
230 x-rays for covid-19 detection using convolutional neural networks. *medRxiv*.
- 231 Albahli, S. (2020). A deep neural network to distinguish covid-19 from other chest diseases using x-ray  
232 images. *Current Medical Imaging*.
- 233 Alfasly, S. A. S., Hu, Y., Liang, T., Jin, X., Zhao, Q., and Liu, B. (2019). Variational representation  
234 learning for vehicle re-identification. In *2019 IEEE International Conference on Image Processing*  
235 *(ICIP)*, pages 3118–3122. IEEE.
- 236 Alghaili, M., Li, Z., and Ali, H. A. (2020). Facefilter: Face identification with deep learning and filter  
237 algorithm. *Scientific Programming*, 2020.
- 238 Apostolopoulos, I. D., Aznaouridis, S. I., and Tzani, M. A. (2020). Extracting possibly representa-  
239 tive covid-19 biomarkers from x-ray images with deep learning approach and image data related to  
240 pulmonary diseases. *Journal of Medical and Biological Engineering*, 40:462–469.
- 241 Apostolopoulos, I. D. and Mpesiana, T. A. (2020). Covid-19: automatic detection from x-ray images  
242 utilizing transfer learning with convolutional neural networks. *Physical and Engineering Sciences in*  
243 *Medicine*, page 1.
- 244 Chowdhury, M. E., Rahman, T., Khandakar, A., Mazhar, R., Kadir, M. A., Mahbub, Z. B., Islam, K. R.,  
245 Khan, M. S., Iqbal, A., Al Emadi, N., et al. (2020). Can ai help in screening viral and covid-19  
246 pneumonia? *IEEE Access*, 8:132665–132676.
- 247 Civit-Masot, J., Luna-Perejón, F., Domínguez Morales, M., and Civit, A. (2020). Deep learning system  
248 for covid-19 diagnosis aid using x-ray pulmonary images. *Applied Sciences*, 10(13):4640.
- 249 El Asnaoui, K. and Chawki, Y. (2020). Using x-ray images and deep learning for automated detection of  
250 coronavirus disease. *Journal of Biomolecular Structure and Dynamics*, pages 1–12.
- 251 El-bana, S., Al-Kabbany, A., and Sharkas, M. (2020). A multi-task pipeline with specialized streams for  
252 classification and segmentation of infection manifestations in covid-19 scans. *PeerJ Computer Science*,  
253 6:e303.
- 254 Farooq, M. and Hafeez, A. (2020). Covid-resnet: A deep learning framework for screening of covid19  
255 from radiographs. *arXiv preprint arXiv:2003.14395*.
- 256 Hemdan, E. E.-D., Shouman, M. A., and Karar, M. E. (2020). Covidx-net: A framework of deep learning  
257 classifiers to diagnose covid-19 in x-ray images. *arXiv preprint arXiv:2003.11055*.
- 258 Hirano, H., Koga, K., and Takemoto, K. (2020). Vulnerability of deep neural networks for detecting  
259 covid-19 cases from chest x-ray images to universal adversarial attacks. *Plos one*, 15(12):e0243963.
- 260 Horry, M. J., Chakraborty, S., Paul, M., Ulhaq, A., Pradhan, B., Saha, M., and Shukla, N. (2020). Covid-19  
261 detection through transfer learning using multimodal imaging data. *IEEE Access*, 8:149808–149824.
- 262 Howard, A. G., Zhu, M., Chen, B., Kalenichenko, D., Wang, W., Weyand, T., Andreetto, M., and Adam,  
263 H. (2017). Mobilenets: Efficient convolutional neural networks for mobile vision applications. *arXiv*  
264 *preprint arXiv:1704.04861*.
- 265 Huang, R.-Y., Dung, L.-R., Chu, C.-F., and Wu, Y.-Y. (2016). Noise removal and contrast enhancement  
266 for x-ray images. *Journal of Biomedical Engineering and Medical Imaging*, 3(1):56.
- 267 Jamil, M., Hussain, I., et al. (2020). Automatic detection of covid-19 infection from chest x-ray using  
268 deep learning. *medRxiv*.
- 269 Khare, V. and Chugh, S. (2014). An efficient adaptive median filtering approach for the removal of  
270 impulse noise. In *2014 International Conference on Advances in Engineering & Technology Research*  
271 *(ICAETR-2014)*, pages 1–5. IEEE.
- 272 Kim, K., Choi, J., and Lee, Y. (2020). Effectiveness of non-local means algorithm with an industrial 3  
273 mev linac high-energy x-ray system for non-destructive testing. *Sensors*, 20(9):2634.
- 274 Kingma, D. P. and Ba, J. (2014). Adam: A method for stochastic optimization. *arXiv preprint*  
275 *arXiv:1412.6980*.
- 276 Luz, E., Silva, P. L., Silva, R., Silva, L., Moreira, G., and Menotti, D. (2020). Towards an effective  
277 and efficient deep learning model for covid-19 patterns detection in x-ray images. *arXiv preprint*  
278 *arXiv:2004.05717*.
- 279 Maghdid, H. S., Asaad, A. T., Ghafoor, K. Z., Sadiq, A. S., and Khan, M. K. (2020). Diagnosing covid-19

- 280 pneumonia from x-ray and ct images using deep learning and transfer learning algorithms. *arXiv*  
281 *preprint arXiv:2004.00038*.
- 282 Maguolo, G. and Nanni, L. (2020). A critic evaluation of methods for covid-19 automatic detection from  
283 x-ray images. *arXiv preprint arXiv:2004.12823*.
- 284 Mirzabagheri, M. (2017). A new adaptive method for removing impulse noise from medical images.  
285 *Signal Processing and Renewable Energy*, 1(1):37–45.
- 286 Narin, A., Kaya, C., and Pamuk, Z. (2020). Automatic detection of coronavirus disease (covid-19) using  
287 x-ray images and deep convolutional neural networks. *arXiv preprint arXiv:2003.10849*.
- 288 Ning, C.-Y., Liu, S.-f., and Qu, M. (2009). Research on removing noise in medical image based on median  
289 filter method. In *2009 IEEE International Symposium on IT in Medicine & Education*, volume 1, pages  
290 384–388. IEEE.
- 291 Ozturk, T., Talo, M., Yildirim, E. A., Baloglu, U. B., Yildirim, O., and Acharya, U. R. (2020). Automated  
292 detection of covid-19 cases using deep neural networks with x-ray images. *Computers in Biology and*  
293 *Medicine*, page 103792.
- 294 Paul, E. M., Perumal, B., and Rajasekaran, M. P. (2018). Filters used in x-ray chest images for initial  
295 stage tuberculosis detection. In *2018 International Conference on Inventive Research in Computing*  
296 *Applications (ICIRCA)*, pages 235–239. IEEE.
- 297 Pun, N. S. and Agarwal, S. (2020). Automated diagnosis of covid-19 with limited posteroanterior chest  
298 x-ray images using fine-tuned deep neural networks. *Applied Intelligence*, pages 1–14.
- 299 Rabbouch, H., Messaoud, O. B., and Saâdaoui, F. (2020). Multi-scaled non-local means parallel filters for  
300 medical image denoising. In *International Conference on Algorithms and Architectures for Parallel*  
301 *Processing*, pages 606–613. Springer.
- 302 Raj, P. and Venkateswarlu, T. (2012). Denoising of magnetic resonance and x-ray images using variance  
303 stabilization and patch based algorithms. *International Journal of Multimedia & Its Applications*, 4.
- 304 Rezaul Karim, M., Döhmen, T., Rebholz-Schuhmann, D., Decker, S., Cochez, M., and Beyan, O. (2020).  
305 Deepcovidexplainer: Explainable covid-19 diagnosis based on chest x-ray images. *arXiv e-prints*,  
306 pages arXiv–2004.
- 307 Saiz, F. A. and Barandiaran, I. (2020). Covid-19 detection in chest x-ray images using a deep learning  
308 approach. *International Journal of Interactive Multimedia and Artificial Intelligence, InPress (InPress)*,  
309 1.
- 310 Sawant, A., Zeman, H., Muratore, D., Samant, S., and DiBianca, F. (1999). *Adaptive median filter*  
311 *algorithm to remove impulse noise in x-ray and CT images and speckle in ultrasound images*, volume  
312 3661, pages 1263–1274. Society of Photo-Optical Instrumentation Engineers, ii edition. Proceedings  
313 of the 1999 Medical Imaging - Image Processing ; Conference date: 22-02-1999 Through 25-02-1999.
- 314 Senthilkumar, R. and Senthilmurugan, M. (2014). Triad histogram to enhance chest x-ray image. *Int J*  
315 *Adv Res Comput Commun Eng*, 3:8577–80.
- 316 Sethy, P. K. and Behera, S. K. (2020). Detection of coronavirus disease (covid-19) based on deep features.  
317 *Preprints*, 2020030300:2020.
- 318 Siddhartha, M. and Santra, A. (2020). Covidlite: A depth-wise separable deep neural network with white  
319 balance and clahe for detection of covid-19. *arXiv preprint arXiv:2006.13873*.
- 320 Tartaglione, E., Barbano, C. A., Berzovini, C., Calandri, M., and Grangetto, M. (2020). Unveiling  
321 covid-19 from chest x-ray with deep learning: a hurdles race with small data. *International Journal of*  
322 *Environmental Research and Public Health*, 17(18):6933.
- 323 Ucar, F. and Korkmaz, D. (2020). Covidiagnosis-net: Deep bayes-squeezenet based diagnosis of the  
324 coronavirus disease 2019 (covid-19) from x-ray images. *Medical Hypotheses*, 140:109761.
- 325 Wang, L., Lin, Z. Q., and Wong, A. (2020). Covid-net: a tailored deep convolutional neural network  
326 design for detection of covid-19 cases from chest x-ray images. *Scientific Reports*, 10(1):19549.
- 327 Yu, D., Xu, Q., Guo, H., Zhao, C., Lin, Y., and Li, D. (2020). An efficient and lightweight convolutional  
328 neural network for remote sensing image scene classification. *Sensors*, 20(7):1999.
